# Supplementary material for: Proteomic analysis of granulomas from cattle and pigs naturally infected with Mycobacterium tuberculosis complex by MALDI imaging
Source: Front Immunol. 2024 Jul 3;15:1369278. doi: 10.3389/fimmu.2024.1369278 (PMC11252589; doi:10.3389/fimmu.2024.1369278)
Supplement: Supplementary file 7 [file Table_5.xlsx]

## Sheet: t_test<0.0001_fold-change_heatm
Specie	Observed mass	t.stat	p.value	FDR	Observed mass	Fold-change	Log2
Cattle	2118.1	13503	9.06e-19	6.8e-16	2118.1	146220	5.16501
Cattle	2117.8	10046	1.57e-11	3.01e-10	2117.8	130300	5.11494
Cattle	2116.7	10358	4.08e-12	8.88e-11	2116.7	120370	5.08052
Cattle	2115.75	85316	1.16e-12	1.25e-07	2115.75	118220	5.07269
Cattle	2115.8	78348	2.46e-07	2e-06	2115.8	107170	5.03007
Cattle	2117.7	96777	7.73e-11	1.28e-09	2117.7	104080	5.01737
Cattle	1980.1	79703	1.36e-07	1.16e-06	1980.1	96342	4.98382
Cattle	2115.65	74028	1.62e-06	1.15e-05	2115.65	92731	4.96722
Cattle	1980	7.24	3.29e-06	2.24e-05	1980	85078	4.92982
Cattle	2023.2	80141	1.12e-07	9.84e-07	2023.2	63132	4.80025
Cattle	2024	81334	6.65e-08	6.04e-07	2024	52219	4.71783
Cattle	1825.4	80379	1.01e-07	8.96e-07	1825.4	43266	4.63615
Cattle	2220.35	74413	1.37e-06	9.81e-06	2220.35	35571	4.5511
Cattle	2118.3	10136	1.06e-11	2.14e-11	2118.3	22166	4.34569
Cattle	2118.95	69083	1.38e-05	8.39e-05	2118.95	13631	4.13453
Cattle	2118.55	95957	1.1e-10	1.77e-09	2118.55	8613.7	3.93519
Cattle	2116.75	13.49	9.52e-18	6.8e-16	2116.75	7663.4	3.88442
Cattle	2116.5	13401	1.36e-17	9.17e-16	2116.5	7323.2	3.8647
Cattle	2115.55	81544	6.06e-08	5.59e-07	2115.55	6042.3	3.7812
Cattle	1979.2	84882	1.4e-09	1.49e-07	1979.2	5035.1	3.70201
Cattle	2491.1	79085	1.78e-07	1.49e-06	2491.1	4268.3	3.63025
Cattle	2119	10734	8.13e-13	2.14e-11	2119	4246.4	3.62802
Cattle	2115.6	94314	2.26e-14	3.36e-09	2115.6	3287.3	3.51684
Cattle	2023	98922	3.05e-12	5.4e-11	2023	2877	3.45894
Cattle	2115.5	71509	4.84e-06	3.18e-05	2115.5	2709.6	3.43291
Cattle	2114.95	68836	1.53e-05	9.23e-05	2114.95	2291.9	3.3602
Cattle	2115.15	78122	2.72e-08	2.17e-06	2115.15	2272.9	3.35658
Cattle	2118.65	71166	5.61e-06	3.64e-05	2118.65	2191.1	3.34066
Cattle	2117.4	12991	6.98e-17	4.15e-15	2117.4	1969	3.29425
Cattle	2117.65	10016	1.78e-12	3.4e-10	2117.65	1836.4	3.26397
Cattle	2116.05	11026	2.35e-13	6.82e-12	2116.05	1813	3.2584
Cattle	2118.6	71608	4.63e-06	3.08e-05	2118.6	1729.4	3.2379
Cattle	2220.3	74061	1.6e-06	1.14e-05	2220.3	1548.5	3.18991
Cattle	2490.55	72103	3.74e-06	2.53e-05	2490.55	1471.4	3.16773
Cattle	2116.8	95453	1.38e-11	2.15e-09	2116.8	1443.8	3.15951
Cattle	2116.6	82634	3.76e-08	3.59e-07	2116.6	1426.6	3.1543
Cattle	2490.6	85703	9.79e-09	1.07e-07	2490.6	1360.9	3.13383
Cattle	2490.65	84307	1.81e-08	1.87e-07	2490.65	1304	3.11528
Cattle	2022.95	81926	5.13e-08	4.78e-08	2022.95	1273.3	3.10493
Cattle	2119.35	73218	2.3e-06	1.6e-05	2119.35	869.92	2.93948
Cattle	2119.2	94042	2.54e-10	3.75e-09	2119.2	794.75	2.90023
Cattle	2117.2	14196	6.02e-19	5.58e-17	2117.2	791.79	2.89861
Cattle	2119.25	6631	4.53e-05	2.51e-05	2119.25	788.55	2.89683
Cattle	2116.95	14625	1.16e-19	1.33e-18	2116.95	786.6	2.89575
Cattle	2116.55	11558	2.5e-14	8.12e-13	2116.55	741.07	2.86986
Cattle	2116.3	12185	1.85e-15	8.17e-14	2116.3	735.8	2.86676
Cattle	2119.1	83995	2.07e-08	2.09e-07	2119.1	728.17	2.86223
Cattle	2115.85	10449	2.76e-13	6.32e-11	2115.85	715.4	2.85455
Cattle	2119.3	8026	1.06e-07	9.4e-07	2119.3	614.56	2.78856
Cattle	2119.45	88086	3.44e-09	4.1e-08	2119.45	605.47	2.78209
Cattle	2118.75	85466	1.09e-08	1.18e-07	2118.75	509.58	2.70721
Cattle	2115.4	96566	8.48e-11	1.38e-09	2115.4	506.94	2.70496
Cattle	2118.5	70731	6.77e-07	4.32e-05	2118.5	436.17	2.63966
Cattle	2118.35	77963	2.91e-07	2.32e-06	2118.35	432.91	2.6364
Cattle	2116	90506	1.19e-09	1.53e-08	2116	393.13	2.59454
Cattle	2118.4	82282	4.39e-08	4.15e-07	2118.4	391.97	2.59325
Cattle	2115.3	77792	3.14e-07	2.48e-06	2115.3	386.25	2.58687
Cattle	2489.95	84401	1.73e-08	1.81e-07	2489.95	372	2.57054
Cattle	2118.45	78519	2.28e-07	1.86e-06	2118.45	358.65	2.55467
Cattle	2117.85	12915	9.47e-17	5.26e-15	2117.85	342.46	2.53461
Cattle	2118.25	84228	1.87e-08	1.91e-07	2118.25	326.25	2.51355
Cattle	2118.85	84246	1.85e-08	1.91e-07	2118.85	321.05	2.50657
Cattle	2116.65	10704	9.25e-13	2.38e-11	2116.65	309.09	2.49008
Cattle	2116.9	12376	8.45e-16	3.98e-14	2116.9	305.05	2.48437
Cattle	2489.9	74439	1.35e-06	9.73e-06	2489.9	269.59	2.4307
Cattle	1956.4	8447	1.68e-09	1.77e-07	1956.4	256.24	2.40865
Cattle	2118.9	87687	4.1e-09	4.81e-08	2118.9	247.88	2.39424
Cattle	2489.75	71519	4.82e-06	3.18e-05	2489.75	236.21	2.3733
Cattle	2489.7	76917	4.6e-08	3.55e-06	2489.7	224.84	2.35187
Cattle	1979.8	86466	7e-09	7.88e-08	1979.8	218.39	2.33923
Cattle	2116.25	91639	7.27e-10	9.76e-09	2116.25	213.4	2.32919
Cattle	2116.45	10057	1.49e-11	2.92e-11	2116.45	198.67	2.29813
Cattle	2118.15	10837	5.25e-13	1.44e-11	2118.15	186.58	2.27087
Cattle	2022.75	73235	2.29e-07	1.59e-05	2022.75	174.53	2.24187
Cattle	2023.05	7145	4.96e-06	3.25e-05	2023.05	161.24	2.20747
Cattle	2117.75	99378	2.5e-11	4.53e-10	2117.75	159.45	2.20262
Cattle	2118.05	93836	2.78e-10	4.05e-09	2118.05	156.04	2.19324
Cattle	1980.05	68819	1.54e-05	9.28e-05	1980.05	150.96	2.17886
Cattle	1096.95	69481	1.16e-05	7.17e-05	1096.95	141.8	2.15168
Cattle	2220.1	10478	2.44e-12	5.81e-11	2220.1	130.11	2.11431
Cattle	2118.2	10933	3.49e-13	9.68e-12	2118.2	112.53	2.05127
Cattle	2116.35	82176	4.6e-08	4.34e-07	2116.35	108.34	2.03479
Cattle	1979.4	74762	1.18e-06	8.5e-06	1979.4	107.1	2.02979
Cattle	2116.1	91729	6.99e-10	9.48e-09	2116.1	104.93	2.0209
Cattle	1097.05	95583	1.3e-14	2.06e-09	1097.05	93.507	1.97084
Cattle	2116.15	76062	6.68e-07	5.01e-07	2116.15	91.192	1.95996
Cattle	1979.85	8265	3.73e-08	3.58e-07	1979.85	88.218	1.94556
Cattle	2117.15	10642	1.21e-12	3.04e-11	2117.15	83.789	1.92319
Cattle	1097.25	10154	9.81e-12	2.01e-10	1097.25	83.216	1.92021
Cattle	2023.1	90421	1.24e-09	1.58e-09	2023.1	81.983	1.91372
Cattle	2116.2	11166	1.3e-13	3.83e-12	2116.2	81.781	1.91265
Cattle	2117.35	96337	9.36e-11	1.52e-09	2117.35	81.233	1.90973
Cattle	1978.3	88547	2.81e-09	3.38e-08	1978.3	75.031	1.87524
Cattle	2023.25	95402	1.41e-10	2.18e-10	2023.25	72.494	1.8603
Cattle	1957.55	69037	1.41e-06	8.51e-05	1957.55	70.282	1.84684
Cattle	1978.95	10365	3.95e-12	8.66e-11	1978.95	69.648	1.84291
Cattle	2117.6	92246	5.57e-10	7.74e-09	2117.6	69.074	1.83931
Cattle	1979.3	71111	5.75e-06	3.71e-05	1979.3	67.125	1.82688
Cattle	1269.1	68761	1.58e-05	9.47e-05	1269.1	64.753	1.81126
Cattle	1583.15	79686	1.37e-08	1.17e-06	1583.15	64.185	1.80743
Cattle	2116.4	96855	7.48e-11	1.25e-09	2116.4	62.493	1.79583
Cattle	2117.9	11841	7.7e-15	2.79e-13	2117.9	61.466	1.78863
Cattle	2234.05	71102	5.77e-07	3.72e-06	2234.05	61.21	1.78682
Cattle	1956.2	10125	1.11e-11	2.22e-10	1956.2	60.848	1.78425
Cattle	1979.35	95713	1.23e-10	1.96e-09	1979.35	60.317	1.78044
Cattle	2117.95	12041	3.36e-15	1.38e-13	2117.95	58.864	1.76985
Cattle	1979.55	68936	1.47e-05	8.86e-05	1979.55	57.326	1.75835
Cattle	1583.35	89445	1.9e-09	2.34e-08	1583.35	56.147	1.74933
Cattle	2117.25	10.47	2.53e-12	5.96e-11	2117.25	53.068	1.72483
Cattle	1979.15	91026	9.5e-10	1.25e-08	1979.15	50.155	1.70031
Cattle	1978.05	84252	1.85e-08	1.91e-07	1978.05	48.801	1.68843
Cattle	1979.9	73658	1.9e-06	1.34e-05	1979.9	47.719	1.67869
Cattle	1956.25	77731	3.22e-07	2.54e-06	1956.25	47.467	1.67639
Cattle	1979.1	76132	6.48e-07	4.88e-06	1979.1	46.84	1.67062
Cattle	2219.65	83569	2.5e-08	2.47e-07	2219.65	44.837	1.65164
Cattle	1956.85	77247	3.98e-07	3.11e-06	1956.85	42.804	1.63148
Cattle	2117.55	99549	2.32e-11	4.27e-10	2117.55	41.121	1.61406
Cattle	2022.1	80555	9.36e-09	8.32e-07	2022.1	41.039	1.6132
Cattle	2117.45	10724	8.5e-14	2.21e-11	2117.45	39.479	1.59637
Cattle	2117.5	10452	2.72e-12	6.3e-11	2117.5	39.428	1.5958
Cattle	1582.7	80046	1.17e-07	1.02e-06	1582.7	38.616	1.58677
Cattle	2490.4	99218	2.68e-11	4.82e-10	2490.4	38.423	1.58459
Cattle	2490.35	7876	2.05e-07	1.7e-06	2490.35	36.537	1.56273
Cattle	2022.35	84094	1.98e-08	2.01e-07	2022.35	35.846	1.55444
Cattle	2220.2	64816	8.55e-05	4.57e-05	2220.2	35.812	1.55403
Cattle	1979.65	78473	2.33e-07	1.9e-06	1979.65	35.79	1.55376
Cattle	1583.3	89054	2.25e-09	2.75e-08	1583.3	33.623	1.52664
Cattle	1978.25	93708	2.94e-10	4.25e-09	1978.25	33.387	1.52358
Cattle	1980.25	84014	2.05e-09	2.08e-07	1980.25	32.943	1.51776
Cattle	1535.25	83293	2.82e-08	2.77e-07	1535.25	31.719	1.50132
Cattle	2490.15	99731	2.15e-11	3.97e-10	2490.15	31.578	1.49938
Cattle	2490.2	90916	9.97e-10	1.3e-08	2490.2	31.46	1.49776
Cattle	1583	70749	6.72e-06	4.3e-05	1583	31.37	1.49651
Cattle	2022.8	10244	6.66e-12	1.39e-11	2022.8	31.358	1.49635
Cattle	2490.1	81738	5.57e-08	5.18e-07	2490.1	31.058	1.49217
Cattle	1955.95	74253	1.47e-06	1.05e-05	1955.95	30.728	1.48753
Cattle	1978.2	84886	1.4e-09	1.49e-07	1978.2	29.563	1.47075
Cattle	1583.6	92947	4.1e-10	5.83e-09	1583.6	29.459	1.46922
Cattle	1977.85	70091	8.93e-06	5.62e-06	1977.85	28.58	1.45606
Cattle	2219.4	82111	4.73e-08	4.43e-07	2219.4	28.539	1.45544
Cattle	2022.2	72089	3.76e-06	2.54e-06	2022.2	27.385	1.43751
Cattle	1097.15	58168	0.00138	6.15e-07	1097.15	25.607	1.40836
Cattle	2219.85	78338	2.47e-11	2e-06	2219.85	25.12	1.40002
Cattle	1583.55	81335	6.65e-08	6.04e-07	1583.55	24.887	1.39597
Cattle	1582.5	81242	6.92e-08	6.27e-07	1582.5	24.864	1.39557
Cattle	2023.45	89978	1.5e-09	1.89e-08	2023.45	23.692	1.3746
Cattle	2220.8	67772	2.42e-05	1.4e-05	2220.8	23.379	1.36883
Cattle	1978.4	70053	9.08e-07	5.68e-05	1978.4	22.15	1.34537
Cattle	1652.85	75694	7.84e-07	5.83e-06	1652.85	22.13	1.34498
Cattle	1978	86036	8.46e-09	9.35e-08	1978	21.436	1.33114
Cattle	1978.5	76711	5.03e-08	3.86e-06	1978.5	20.579	1.31342
Cattle	1583.25	71703	4.45e-06	2.96e-05	1583.25	20.419	1.31003
Cattle	1583.4	77046	4.35e-08	3.38e-06	1583.4	19.744	1.29544
Cattle	1978.45	90891	1.01e-09	1.3e-08	1978.45	19.45	1.28892
Cattle	1097.1	8389	2.17e-08	2.17e-07	1097.1	19.362	1.28695
Cattle	2219.2	10977	2.89e-13	8.31e-12	2219.2	19.287	1.28526
Cattle	2023.55	7652	5.47e-07	4.15e-07	2023.55	19.08	1.28058
Cattle	1582.45	79811	1.3e-07	1.11e-07	1582.45	18.348	1.26359
Cattle	2219.45	77279	3.92e-07	3.07e-06	2219.45	17.411	1.24082
Cattle	1535.45	81336	6.65e-08	6.04e-07	1535.45	16.978	1.22989
Cattle	1957.3	75207	9.7e-08	7.08e-06	1957.3	16.334	1.21309
Cattle	1824.95	88097	3.43e-09	4.1e-08	1824.95	16.311	1.21248
Cattle	1957.1	8103	7.6e-08	6.83e-07	1957.1	15.163	1.18079
Cattle	1098.15	79378	1.57e-07	1.32e-06	1098.15	15.035	1.1771
Cattle	2234.25	68112	2.09e-05	1.23e-05	2234.25	14.599	1.16432
Cattle	2022.55	88835	2.48e-09	2.99e-08	2022.55	14.575	1.16361
Cattle	2489.5	72873	2.68e-06	1.84e-05	2489.5	14.119	1.1498
Cattle	2234.3	68517	1.76e-05	1.04e-05	2234.3	13.685	1.13624
Cattle	2217.4	78761	2.05e-08	1.7e-06	2217.4	13.432	1.12814
Cattle	1957.15	71121	5.72e-06	3.7e-06	1957.15	13.422	1.12782
Cattle	1825.6	72681	2.91e-06	1.99e-06	1825.6	13.395	1.12694
Cattle	2489.25	71539	4.77e-06	3.16e-05	2489.25	12.593	1.10013
Cattle	2022.65	78899	1.93e-07	1.61e-06	2022.65	12.562	1.09906
Cattle	1097.95	70735	6.76e-06	4.32e-05	1097.95	12.333	1.09107
Cattle	2218.75	10811	5.87e-13	1.6e-11	2218.75	12.167	1.08518
Cattle	1824.05	69514	1.14e-05	7.08e-05	1824.05	11.977	1.07835
Cattle	1653.5	4782	0.0847	2.84e-05	1653.5	11.559	1.06292
Cattle	2218.3	10337	4.47e-16	9.61e-11	2218.3	11.092	1.04501
Cattle	1097.3	79298	1.62e-07	1.36e-06	1097.3	10.615	1.02592
Cattle	1747.95	4599	0.0169	5.37e-05	1747.95	10.575	1.02428
Cattle	2219.9	82762	3.56e-08	3.43e-07	2219.9	10.384	1.01636
Cattle	1956.65	8742	4.61e-09	5.32e-08	1956.65	10.043	1.00186
Cattle	1956.95	71708	4.44e-06	2.96e-05	1956.95	8.2921	0.918665
Cattle	2219.3	72609	3e-06	2.05e-05	2219.3	8.2845	0.918266
Cattle	1651.95	71202	5.52e-06	3.59e-05	1651.95	6.9846	0.844142
Cattle	1747	70858	6.41e-06	4.12e-05	1747	6.8156	0.833504
Cattle	1956.7	7603	6.77e-07	5.07e-06	1956.7	5.8553	0.767549
Table S-5. List of the Fold-change calculated for the masses obtained in cattle
